# Supplementary material for: Synthesis and optimization of Ni/Mo-impregnated kaolin-based ZSM-5 as a catalytic hydrocracking catalyst for heavy petroleum distillates
Source: Royal Society of Chemistry journal article supplement (doi:10.1039/d3se01573d), 2024-01-01
Supplement: d3se01573d1.pdf [file d3se01573d1.pdf]

## Supplementary Information

**Table 1A.S.** Gas chromatography parameters used in this study

| Component | Parameter                 | Value   |
|-----------|---------------------------|---------|
| Injector  | Temperature (°C)          | 300     |
|           | Split ratio               | 100 : 1 |
|           | Injection volume (μL)     | 0.2     |
| FID       | Initial temperature (°C)  | 35      |
|           | Detector temperature (°C) | 350     |
|           | Holding time (min)        | 5       |
| Oven      | Temperature 1 (°C)        | 280     |
|           | Heating rate 1 (°C/min)   | 10      |
|           | Holding time 1 (min)      | 3.5     |
|           | Temperature 2 (°C)        | 325     |
|           | Heating rate 2 (°C/min)   | 10      |
|           | Holding time 2 (min)      | 90      |

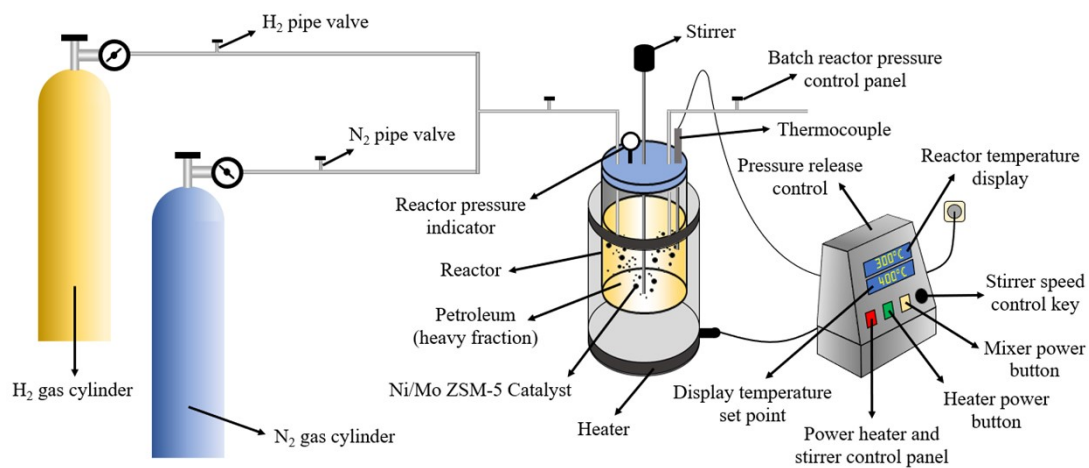

**Figure 1A.S.** Catalytic hydrocracking process equipment
